# Supplementary material for: Current practice patterns in microvascular decompression for trigeminal neuralgia: results from an international survey
Source: Research Square preprint supplement (doi:10.21203/rs.3.rs-7446556/v1), 2025-09-04
Supplement: Supplementary file 1 [file 2baf14065a73dbac19bbcf39.docx]

**Supplementary table: Questions and responses in their original German wording**

| **Item** | **Question** | **Response Options** | **n (%)** |
| --- | --- | --- | --- |
| 1 | Sehen Sie - unabhängig von Komorbiditäten - eine Altersgrenze für die Indikation zur mikrovaskulären Dekompression? | ja: ≥80 Jahre | 4 (6.35) |
|  |  | ja: 75-79 Jahre | 0 (0) |
|  |  | ja: 70-74 Jahre | 0 (0) |
|  |  | nein | 59 (93.65) |
| 2 | Wie wird bei Ihnen eine mikrovaskuläre Dekompression üblicherweise durchgeführt? | mikrochirurgisch | 41 (65.08) |
|  |  | mikrochirurgisch mit endoskopischer Unterstützung | 19 (30.16) |
|  |  | rein endoskopisch | 1 (1.59) |
|  |  | exoskopisch (Orbeye etc.) | 1 (1.59) |
|  |  | unterschiedlich | 1 (1.59) |
| 3 | In welcher Lagerung führen Sie mikrovaskuläre Dekompressionen üblicherweise durch? | Rückenlage | 29 (46.03) |
|  |  | Seitenlage/Parkbank | 25 (39.68) |
|  |  | Bauchlage | 4 (6.35) |
|  |  | sitzend/halbsitzend | 1 (1.59) |
|  |  | unterschiedlich | 4 (6.35) |
| 4 | Benutzen Sie Neuronavigation zur Planung der Trepanation? | ja, immer oder oft | 16 (25.40) |
|  |  | nein, nie oder selten | 40 (63.49) |
|  |  | manchmal | 7 (11.11) |
| 5 | Nutzen Sie während einer mikrovaskulären Dekompression Neuromonitoring (Facialis-MEP, AEP)? | ja | 45 (71.43) |
|  |  | nein | 13 (20.63) |
|  |  | manchmal | 5 (7.94) |
| 6 | Wie führen Sie bei einer mikrovaskulären Dekompression die Trepanation durch? | osteoplastisch | 23 (36.51) |
|  |  | osteoklastisch mit Palacosplastik, Knochenersatz o. ä. | 23 (36.51) |
|  |  | osteoklastisch mit Einsetzen der Knochenspäne | 7 (11.11) |
|  |  | osteoklastisch mit allogener Defektdeckung (Mesh, Bohrlochabdeckung etc.) | 2 (3.17) |
|  |  | osteoklastisch ohne Kranioplastik | 1 (1.59) |
|  |  | unterschiedlich | 7 (11.11) |
| 7 | Benutzen Sie bei der mikrovaskulären Dekompression selbsthaltende Spatel? | ja, immer oder oft | 33 (52.38) |
|  |  | nein oder nur während des Zugangs | 25 (39.68) |
|  |  | unterschiedlich | 5 (7.94) |
| 8 | Opfern Sie während einer mikrovaskulären Dekompression die Vena petrosa superior? | ja, grundsätzlich oder meistens | 4 (6.35) |
|  |  | ja, wenn nötig (Sichtbehinderung, Kompression etc.) | 18 (28.57) |
|  |  | nein, niemals oder nur bei Blutung | 41 (65.08) |
| 9 | Wodurch separieren Sie bei einer mikrovaskulären Dekompression üblicherweise den Nerv vom Gefäß? | Teflon | 47 (74.60) |
|  |  | Muskel | 6 (9.52) |
|  |  | anderes Interponat (PVA, Dacron, Gelaspon etc.) | 4 (6.35) |
|  |  | Transposition / Sling Retraction ohne Interponat | 6 (9.52) |
| 10 | Fixieren Sie das Interponat mit Fibrinkleber? | ja, immer oder meistens | 40 (63.49) |
|  |  | nein, nie oder selten | 16 (25.40) |
|  |  | manchmal | 7 (11.11) |
| 11 | Streben Sie nach einer mikrovaskulären Dekompression eine wasserdichte Duranaht an (unabhängig vom Einsatz von Tachosil, Duraersatz o. ä.)? | ja, unbedingt | 53 (84.13) |
|  |  | nein, nicht zwingend | 10 (15.87) |
| 12 | Legen Sie bei einer mikrovaskulären Dekompression routinemäßig eine Lumbaldrainage? | ja, vor Beginn der OP | 3 (4.76) |
|  |  | ja, nach Ende der OP | 0 (0) |
|  |  | nein | 60 (95.24) |
| 13 | Ziehen Sie bei Multiple-Sklerose-assoziierter Trigeminusneuralgie eine mikrovaskuläre Dekompression grundsätzlich in Erwägung? | ja | 9 (14.29) |
|  |  | ja, wenn in der MRT ein Gefäß-Nerven-Kontakt vorliegt | 35 (55.56) |
|  |  | nein | 19 (30.16) |
| 14 | Indizieren Sie eine mikrovaskuläre Dekompression bei Trigeminusneuralgie, wenn in der Bildgebung KEIN Gefäß-Nerven-Kontakt zu sehen ist? | ja | 16 (25.40) |
|  |  | manchmal, nach gemeinsamer Entscheidung mit dem Patienten | 42 (66.67) |
|  |  | nein | 5 (7.94) |
