# Supplementary material for: Current practice patterns in microvascular decompression for trigeminal neuralgia: results from an international survey
Source: Research Square preprint supplement (doi:10.21203/rs.3.rs-7446556/v1), 2025-09-04
Supplement: Supplementary file 2 [file 4f7f17bd9a077898be573054.docx]

**Supplementary table: Questions and responses in their original wording, translated to English**

| **Item** | **Question** | **Response Options** | **n (%)** |
| --- | --- | --- | --- |
| 1 | Do you see an age limit for the indication of microvascular decompression, regardless of comorbidities? | yes: ≥80 years | 4 (6.35) |
|  |  | yes: 75-79 years | 0 (0) |
|  |  | yes: 70-74 years | 0 (0) |
|  |  | no | 59 (93.65) |
| 2 | How do you usually perform microvascular decompression? | microsurgically | 41 (65.08) |
|  |  | microsurgically with endoscopic assistance | 19 (30.16) |
|  |  | purely endoscopically | 1 (1.59) |
|  |  | exoscopically (Orbeye, etc.) | 1 (1.59) |
|  |  | varies | 1 (1.59) |
| 3 | In which position do you usually perform microvascular decompression? | supine | 29 (46.03) |
|  |  | lateral/park bench | 25 (39.68) |
|  |  | prone | 4 (6.35) |
|  |  | sitting/semi-sitting | 1 (1.59) |
|  |  | varies | 4 (6.35) |
| 4 | Do you use neuronavigation to plan trepanation? | yes, always or often | 16 (25.40) |
|  |  | no, never or rarely | 40 (63.49) |
|  |  | sometimes | 7 (11.11) |
| 5 | Do you use neuromonitoring (facial nerve MEP, AEP) during microvascular decompression? | yes | 45 (71.43) |
|  |  | no | 13 (20.63) |
|  |  | sometimes | 5 (7.94) |
| 6 | How do you perform trepanation for microvascular decompression? | osteoplastic | 23 (36.51) |
|  |  | osteoclastic with cranioplasty using Palacos, bone replacement or similar | 23 (36.51) |
|  |  | osteoclastic with re-insertion of bone dust | 7 (11.11) |
|  |  | osteoclastic with allogenic reconstruction (mesh, burr hole cover, etc.) | 2 (3.17) |
|  |  | osteoclastic without cranioplasty | 1 (1.59) |
|  |  | varies | 7 (11.11) |
| 7 | Do you use fixed retraction during microvascular decompression? | yes, always or often | 33 (52.38) |
|  |  | no or only during the approach | 25 (39.68) |
|  |  | varies | 5 (7.94) |
| 8 | Do you sacrifice the superior petrosal vein during microvascular decompression? | yes, generally or mostly | 4 (6.35) |
|  |  | yes, if necessary (visual obstruction, compression, etc.) | 18 (28.57) |
|  |  | no, never, or only in case of hemorrhage | 41 (65.08) |
| 9 | How do you usually separate the nerve from the vessel during microvascular decompression? | Teflon | 47 (74.60) |
|  |  | muscle | 6 (9.52) |
|  |  | other material (PVA, Dacron, Gelaspon, etc.) | 4 (6.35) |
|  |  | transposition / Sling Retraction without interposition | 6 (9.52) |
| 10 | Do you secure the interposition material with fibrin glue? | yes, always or mostly | 40 (63.49) |
|  |  | no, never or rarely | 16 (25.40) |
|  |  | sometimes | 7 (11.11) |
| 11 | Do you pursue watertight dural suturing after microvascular decompression (regardless of the use of Tachosil, dural substitute or similar)? | yes, absolutely | 53 (84.13) |
|  |  | no, not imperatively | 10 (15.87) |
| 12 | Do you routinely place a lumbar drain for microvascular decompression? | yes, before surgery | 3 (4.76) |
|  |  | ja, after surgery | 0 (0) |
|  |  | no | 60 (95.24) |
| 13 | Do you generally consider microvascular decompression for trigeminal neuralgia secondary to multiple sclerosis? | yes | 9 (14.29) |
|  |  | yes, if the MRI shows neurovascular contact | 35 (55.56) |
|  |  | no | 19 (30.16) |
| 14 | Do you indicate microvascular decompression for trigeminal neuralgia if there is NO neurovascular contact on imaging? | yes | 16 (25.40) |
|  |  | sometimes, after shared decision-making with the patient | 42 (66.67) |
|  |  | no | 5 (7.94) |
