# Supplementary material for: Current practice patterns in microvascular decompression for trigeminal neuralgia: results from an international survey
Source: Research Square preprint supplement (doi:10.21203/rs.3.rs-7446556/v1), 2025-09-04
Supplement: Supplementary file 3 [file 86ddb0d6c72ac9cf9b8a114d.docx]

To comply with CHERRIES reporting standards, the following aspects are specified:

- **Informed consent**: No informed consent was sought, as the need for it, along with a formal approval, was waived by the responsible review board.
- **Data protection**: The responses could not be assigned to the individual respondents. No personal information was collected.
- **Development and testing**: The questionnaire was piloted with 1 neurosurgeon for clarity and feasibility.
- **Recruitment process**: Invitation was by direct personal or email contact; no public link was used.
- **Advertising**: No advertising took place. The distribution of the access link was handled restrictively.
- **Randomization and adaptive questioning**: Items were presented in fixed order; no adaptive questioning was used.
- **Number of items and screens**: 14 screens, one item per screen
- **Review and change of answers**: Respondents were able to review and modify responses prior to submission.
- **Unique site visitor**: Only one response per institution was accepted. However, the responses recorded could not be assigned to the participants through cookies, and no IP addresses of the client computers were visible to the author.
- **Registration**: no registration was required to participate
- **Handling of incomplete questionnaires**: Only fully completed surveys were included in the analysis.
- **Statistical correction**: Descriptive statistics only; no inferential statistics were applied.
